# Supplementary material for: Immersive Virtual Reality Exergames for Persons Living With Dementia: User-Centered Design Study as a Multistakeholder Team During the COVID-19 Pandemic
Source: PubMed Central journal article supplement (PMC8772876; doi:10.2196/29987), 2022-01-19
Supplement: games_v10i1e29987_app1.pdf [file games_v10i1e29987_app1.pdf]

## **COVID19 - Virtual Reality (VR) Exergames Standard Operating Procedures**

### **Purpose and Background**

The purpose of this protocol is to outline the safety and hygiene procedures that will be taken when conducting the research study entitled “**VR-At-Home: Feasibility of using virtual reality (VR) exergames to promote physical and mental well-being in community-dwelling older adults**”. This protocol has been prepared consulting the following documents: i) healthy safety guidance during COVID19, University of Waterloo ([link](#)), ii) proceedings of the FDA public workshop “Medical extended reality: toward best evaluation practices for virtual and augmented reality in medicine” ([link](#)), and iii) recommendations from the Academy of International Extended Reality “COVID-19 Safety for virtual & augmented reality AIXR Guidelines” ([link](#)). Moreover, this protocol has been created considering procedures and activities that are similar to the ones implemented to disinfect and clean [non-critical medical equipment](#) (e.g., electrocardiography machines) in long-term care facilities ([link](#)).

**The following documentation will be used by one of the members of the research team in charge of sanitizing the VR equipment and handling it to the participants.**

**If you have any questions or concerns, please contact John Muñoz at [john.munoz.hci@uwaterloo.ca](mailto:john.munoz.hci@uwaterloo.ca)**

# VR-At-Home: Feasibility of Using Virtual Reality (VR) Exergames to Promote Physical and Mental Well-Being in Community-Dwelling Older Adults

## VR Equipment that will be used in the study

- **VR system – Oculus Quest 2**
  - Parts:
    - **Head-mounted display**

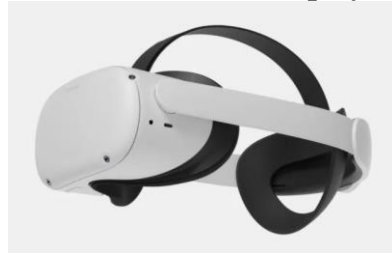

- **Controllers**

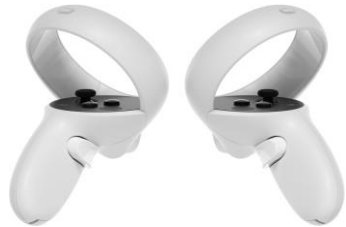

## Necessary Hardware for Hygiene and Safety Considerations

- **Replacement of cover inside of the head-mounted display**

The porous foam material placed on the inside part of the head-mounted display must be replaced as the current one allows bodily fluids to seep into the material, and thus may reduce the effectiveness of the cleaning procedures. To avoid this issue, a silicone cover for the Oculus Quest headset will be used to replace the foam cover; the silicone cover is anti-sweat and allows easy cleaning (Figure 1). Although the VR headset you have at your institution has already included the silicone cover, for the instruction on how to replace the foam with the silicone cover, please watch [this video](#) (for future references).

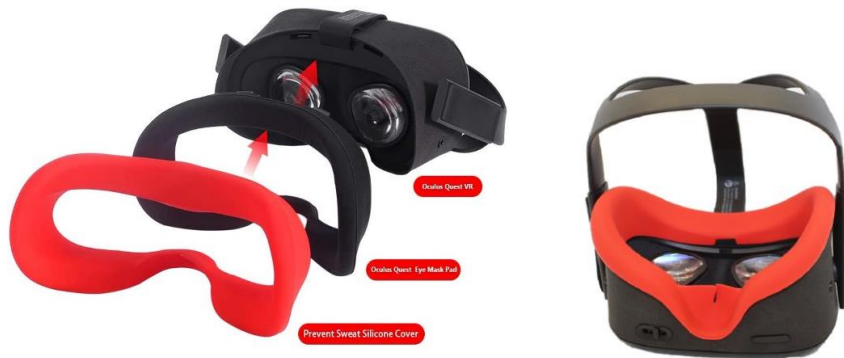

Figure 1. Silicone cover used to replace the foam cover in the Oculus Quest VR headset.

### **Cleaning and disinfection protocol for use of VR equipment**

- **Gloves**
  - Personnel should use disposable surgical gloves or medical examination gloves when manipulating the VR headset.
  
- **Hand hygiene**

Hand hygiene is the most important factor in preventing the transmission of germs/microorganisms and should be performed before and after touching VR equipment.

  - Hand washing: i) Hands must be washed and/or sanitized before beginning to use the VR headset, ii) Hands must be washed and/or sanitized after removing gloves and after performing any surface decontamination. Resources of Public Health Ontario: [how to hand wash video](#).
  - Hand sanitizing: all personnel trained to handle VR equipment should have alcohol-based (60% - 80%) hand sanitizer. Beyond this, frequent wipes on hands and wrists are recommended to ensure thorough sanitizing.
  
- **Cleaning/disinfection of headset and controllers**

Like many other handheld devices, VR controllers can harbor germs. VR controller's surface must be either i) wiped down thoroughly using a soft, non-abrasive damp towel/cloth soaked with 60% - 80% alcohol solution (e.g., isopropyl alcohol), OR ii) sprayed using a 60% - 80% alcohol solution (e.g., isopropyl alcohol) onto the surface, allowing it to sit for 5 minutes, then wipe the surfaces down using a damp disposable soft, non-abrasive towel/cloth before and after using them. Make sure no fire source, including cigarettes, is around when spraying alcohol because it is highly flammable. To avoid damage and/or streaking the lenses (which will cause problems with viewing images), special care should be used when cleaning the lenses on the headset by avoiding spraying alcohol directly on their surface and wiping them down without excessive pressure.
  
- **Save the headset and controllers inside the cover**

After cleaning the VR equipment, both headset and controllers should be securely stored in the case provided to avoid unnecessary exposure.

**Equipment MUST be thoroughly cleaned and disinfected by i) spraying an alcohol solution onto the surface and allow to sit for 5 minutes and then ii) wiped down with a wet disposable towel before giving it to another team member. It is recommended to leave the equipment in the box for three days prior to passing it to another participant.**
